# Supplementary material for: The smallest endohedral borafullerene: structural isomerization, electronic properties, aromaticity and reactivity of U@C27B
Source: Royal Society of Chemistry journal article supplement (doi:10.1039/d4qi00186a), 2024-01-01
Supplement: d4qi00186a1.pdf [file d4qi00186a1.pdf]

*Electronic supplementary information*

**The smallest endohedral borafullerene: structural isomerization,  
electronic property, aromaticity and reactivity of U@C<sub>27</sub>B**

Xinde Li, Lei Lou and Peng Jin\*

School of Materials Science and Engineering, Hebei University of Technology,

Tianjin 300130, China. E-mail: china.peng.jin@gmail.com

**Table S1** Relative energies ( $\Delta E$ , kcal/mol) of ten C<sub>27</sub>B isomers with different spin multiplicities ( $M$ ) at the PBE0/6-311G\*~SDD level of theory.

| Isomers                                   | $M$ | $\Delta E$ |
|-------------------------------------------|-----|------------|
| <i>T<sub>d</sub></i> -C <sub>27</sub> B-1 | 2   | 26.2       |
|                                           | 4   | 19.8       |
|                                           | 6   | 19.0       |
| <i>T<sub>d</sub></i> -C <sub>27</sub> B-2 | 2   | 11.5       |
|                                           | 4   | 3.8        |
|                                           | 6   | 35.0       |
| <i>T<sub>d</sub></i> -C <sub>27</sub> B-3 | 2   | 8.6        |
|                                           | 4   | <b>0.0</b> |
|                                           | 6   | 21.2       |
| <i>D<sub>2</sub></i> -C <sub>27</sub> B-1 | 2   | 30.6       |
|                                           | 4   | 39.9       |
|                                           | 6   | 61.9       |
| <i>D<sub>2</sub></i> -C <sub>27</sub> B-2 | 2   | 41.5       |
|                                           | 4   | 47.1       |
|                                           | 6   | 69.1       |
| <i>D<sub>2</sub></i> -C <sub>27</sub> B-3 | 2   | 23.8       |
|                                           | 4   | 39.6       |
|                                           | 6   | 60.8       |
| <i>D<sub>2</sub></i> -C <sub>27</sub> B-4 | 2   | 38.6       |
|                                           | 4   | 42.7       |
|                                           | 6   | 63.8       |
| <i>D<sub>2</sub></i> -C <sub>27</sub> B-5 | 2   | 40.6       |
|                                           | 4   | 48.1       |
|                                           | 6   | 70.5       |
| <i>D<sub>2</sub></i> -C <sub>27</sub> B-6 | 2   | 41.9       |
|                                           | 4   | 51.8       |
|                                           | 6   | 74.8       |

|                                        |   |      |
|----------------------------------------|---|------|
|                                        | 2 | 48.2 |
| $D_2\text{-C}_{27}\text{B}^6\text{-7}$ | 4 | 49.2 |
|                                        | 6 | 70.8 |

---

**Table S2** Relative energies ( $\Delta E$ , kcal/mol) of ten  $\text{C}_{27}\text{B}^{6-}$  isomers with different spin multiplicities ( $M$ ) at PBE0/6-311G\*~SDD level of theory.

| Isomers                                   | $M$ | $\Delta E$ |
|-------------------------------------------|-----|------------|
|                                           | 2   | <b>0.0</b> |
| $T_d\text{-C}_{27}\text{B}^{6-}\text{-1}$ | 4   | 40.2       |
|                                           | 2   | 7.8        |
| $T_d\text{-C}_{27}\text{B}^{6-}\text{-2}$ | 4   | 40.7       |
|                                           | 2   | 0.6        |
| $T_d\text{-C}_{27}\text{B}^{6-}\text{-3}$ | 4   | 34.2       |
|                                           | 2   | 29.1       |
| $D_2\text{-C}_{27}\text{B}^{6-}\text{-1}$ | 4   | 49.8       |
|                                           | 2   | 40.1       |
| $D_2\text{-C}_{27}\text{B}^{6-}\text{-2}$ | 4   | 58.6       |
|                                           | 2   | 35.8       |
| $D_2\text{-C}_{27}\text{B}^{6-}\text{-3}$ | 4   | 56.2       |
|                                           | 2   | 37.6       |
| $D_2\text{-C}_{27}\text{B}^{6-}\text{-4}$ | 4   | 57.1       |
|                                           | 2   | 40.6       |
| $D_2\text{-C}_{27}\text{B}^{6-}\text{-5}$ | 4   | 61.2       |
|                                           | 2   | 47.7       |
| $D_2\text{-C}_{27}\text{B}^{6-}\text{-6}$ | 4   | 66.4       |
|                                           | 2   | 44.6       |
| $D_2\text{-C}_{27}\text{B}^{6-}\text{-7}$ | 4   | 62.4       |

---

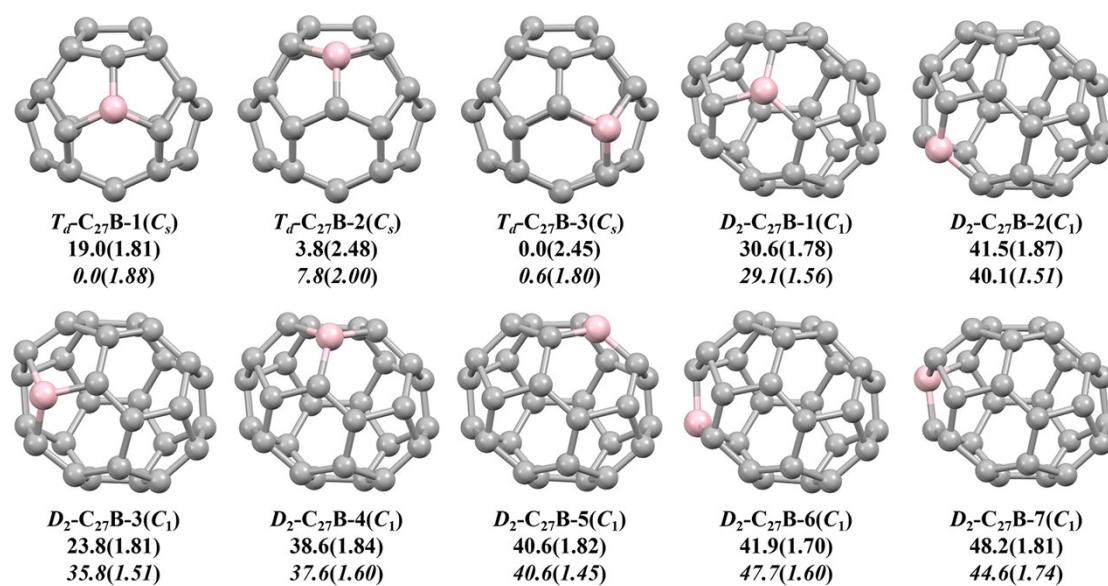

**Fig. S1** Optimized structures and molecular symmetries of ten  $\text{C}_{27}\text{B}$  isomers with relative energies (kcal/mol) and SOMO-LUMO gap energies (eV, in parentheses). The results for their hexaanions are also given in italic fonts (whose structures are omitted because they are very similar to the neutral ones). B: pink; C: gray.

**Table S3** Relative energies (kcal/mol) of ten  $\text{U}@C_{27}\text{B}$  isomers with different spin multiplicities ( $M$ ) at different levels of theory.

| Isomers                                | $M$ | PBE0       | B3LYP      | M06-2X     |
|----------------------------------------|-----|------------|------------|------------|
| $\text{U}@T_d\text{-C}_{27}\text{B-1}$ | 2   | <b>0.0</b> | <b>0.0</b> | <b>0.0</b> |
|                                        | 4   | 67.0       | 64.3       | 71.5       |
| $\text{U}@T_d\text{-C}_{27}\text{B-2}$ | 2   | 13.2       | 13.0       | 14.4       |
|                                        | 4   | 59.5       | 57.8       | 63.8       |
| $\text{U}@T_d\text{-C}_{27}\text{B-3}$ | 2   | 0.1        | 0.1        | 0.5        |
|                                        | 4   | 55.1       | 53.2       | 60.0       |
| $\text{U}@D_2\text{-C}_{27}\text{B-1}$ | 2   | 75.6       | 71.9       | 75.6       |
|                                        | 4   | 110.5      | 105.7      | 111.9      |
| $\text{U}@D_2\text{-C}_{27}\text{B-2}$ | 2   | 92.1       | 88.0       | 92.2       |
|                                        | 4   | 128.3      | 123.0      | 130.0      |
| $\text{U}@D_2\text{-C}_{27}\text{B-3}$ | 2   | 87.5       | 83.6       | 88.0       |
|                                        | 4   | 122.2      | 117.1      | 124.1      |
| $\text{U}@D_2\text{-C}_{27}\text{B-4}$ | 2   | 90.7       | 86.7       | 91.1       |
|                                        | 4   | 127.0      | 121.5      | 123.3      |
| $\text{U}@D_2\text{-C}_{27}\text{B-5}$ | 2   | 93.8       | 89.7       | 94.0       |

|                                                   |   |       |       |       |
|---------------------------------------------------|---|-------|-------|-------|
|                                                   | 4 | 130.7 | 125.3 | 131.8 |
| U@D <sub>2</sub> -C <sub>27</sub> B <sup>-6</sup> | 2 | 103.9 | 99.7  | 104.6 |
|                                                   | 4 | 139.7 | 134.3 | 142.6 |
| U@D <sub>2</sub> -C <sub>27</sub> B <sup>-7</sup> | 2 | 105.6 | 101.2 | 106.2 |
|                                                   | 4 | 144.5 | 137.9 | 147.6 |

**Table S4** Relative energies (kcal/mol) of ten U@C<sub>27</sub>B<sup>+</sup> cation isomers with different spin multiplicities (*M*) at different levels of theory.

| Isomers                                           | <i>M</i> | PBE0       | B3LYP      | M06-2X     |
|---------------------------------------------------|----------|------------|------------|------------|
| U@T <sub>d</sub> -C <sub>27</sub> B <sup>+1</sup> | 1        | 0.5        | 0.5        | <b>0.0</b> |
|                                                   | 3        | 63.0       | 60.5       | 67.0       |
| U@T <sub>d</sub> -C <sub>27</sub> B <sup>+2</sup> | 1        | 13.4       | 14.0       | 14.0       |
|                                                   | 3        | 60.1       | 58.0       | 63.2       |
| U@T <sub>d</sub> -C <sub>27</sub> B <sup>+3</sup> | 1        | <b>0.0</b> | <b>0.0</b> | 0.1        |
|                                                   | 3        | 55.0       | 52.8       | 58.7       |
| U@D <sub>2</sub> -C <sub>27</sub> B <sup>+1</sup> | 1        | 95.2       | 90.5       | 96.3       |
|                                                   | 3        | 114.8      | 109.3      | 118.3      |
| U@D <sub>2</sub> -C <sub>27</sub> B <sup>+2</sup> | 1        | 105.8      | 101.0      | 106.6      |
|                                                   | 3        | 134.0      | 128.0      | 137.6      |
| U@D <sub>2</sub> -C <sub>27</sub> B <sup>+3</sup> | 1        | 105.3      | 100.4      | 107.0      |
|                                                   | 3        | 125.7      | 120.1      | 129.1      |
| U@D <sub>2</sub> -C <sub>27</sub> B <sup>+4</sup> | 1        | 108.3      | 103.3      | 109.8      |
|                                                   | 3        | 125.1      | 119.7      | 128.1      |
| U@D <sub>2</sub> -C <sub>27</sub> B <sup>+5</sup> | 1        | 106.3      | 101.5      | 107.2      |
|                                                   | 3        | 135.4      | 129.4      | 139.0      |
| U@D <sub>2</sub> -C <sub>27</sub> B <sup>+6</sup> | 1        | 116.2      | 111.2      | 117.7      |
|                                                   | 3        | 145.6      | 139.4      | 149.9      |
| U@D <sub>2</sub> -C <sub>27</sub> B <sup>+7</sup> | 1        | 117.9      | 113.0      | 119.6      |
|                                                   | 3        | 144.5      | 138.7      | 148.4      |

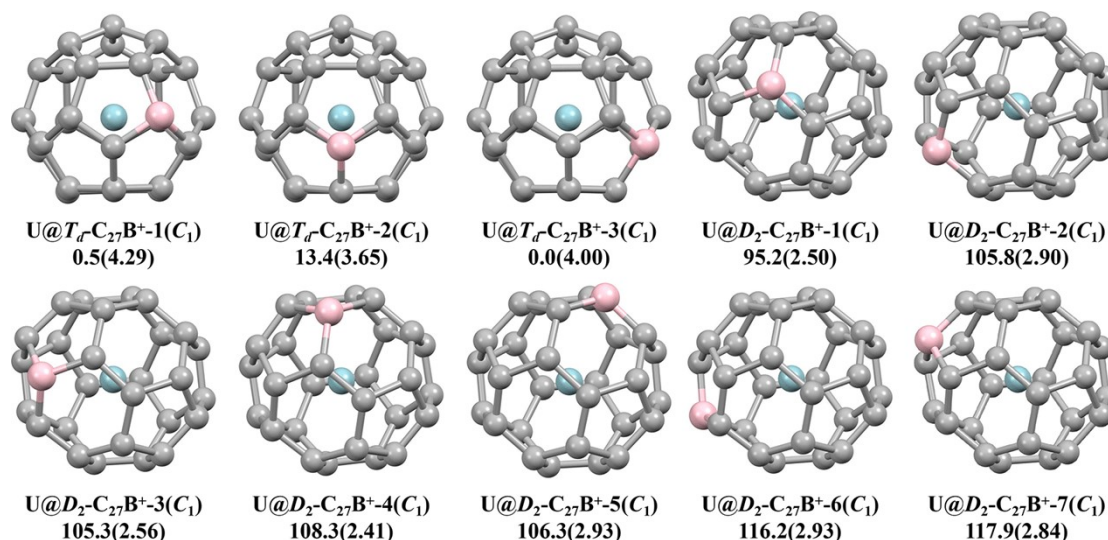

**Fig. S2** Optimized structures and molecular symmetries of ten  $U@C_{27}B^+$  cation isomers with relative energies (kcal/mol) and HOMO-LUMO gap energies (eV, in parentheses). U: blue; B: pink; C: gray.

**Table S5** Relative energies ( $\Delta E$ , kcal/mol) and  $\Sigma\theta_p$  (in degree) of two  $C_{28}$  isomers and ten  $C_{27}B$ ,  $C_{27}B^{6-}$ ,  $U@C_{27}B$ ,  $U@C_{27}B^+$  isomers.

| Isomers              | $\Delta E$ | $\Sigma\theta_p$ | Isomers              | $\Delta E$ | $\Sigma\theta_p$ |
|----------------------|------------|------------------|----------------------|------------|------------------|
| $T_d-C_{28}$         | 0.0        | 486.57           | $D_2-C_{27}B^{6-}-7$ | 44.6       | 493.71           |
| $D_2-C_{28}$         | 33.6       | 491.87           | $U@T_d-C_{27}B-1$    | 0.0        | 486.33           |
| $T_d-C_{27}B-1$      | 19.0       | 486.84           | $U@T_d-C_{27}B-2$    | 13.2       | 486.71           |
| $T_d-C_{27}B-2$      | 3.8        | 486.46           | $U@T_d-C_{27}B-3$    | 0.1        | 486.04           |
| $T_d-C_{27}B-3$      | 0.0        | 486.13           | $U@D_2-C_{27}B-1$    | 75.6       | 490.67           |
| $D_2-C_{27}B-1$      | 30.6       | 491.50           | $U@D_2-C_{27}B-2$    | 92.1       | 491.49           |
| $D_2-C_{27}B-2$      | 41.5       | 492.34           | $U@D_2-C_{27}B-3$    | 87.5       | 491.22           |
| $D_2-C_{27}B-3$      | 23.8       | 491.47           | $U@D_2-C_{27}B-4$    | 90.7       | 491.46           |
| $D_2-C_{27}B-4$      | 38.6       | 492.43           | $U@D_2-C_{27}B-5$    | 93.8       | 491.30           |
| $D_2-C_{27}B-5$      | 40.6       | 492.38           | $U@D_2-C_{27}B-6$    | 103.9      | 492.10           |
| $D_2-C_{27}B-6$      | 41.9       | 492.62           | $U@D_2-C_{27}B-7$    | 105.6      | 492.18           |
| $D_2-C_{27}B-7$      | 48.2       | 492.53           | $U@T_d-C_{27}B^+-1$  | 0.5        | 486.67           |
| $T_d-C_{27}B^{6-}-1$ | 0.0        | 487.98           | $U@T_d-C_{27}B^+-2$  | 13.4       | 487.07           |
| $T_d-C_{27}B^{6-}-2$ | 7.8        | 488.28           | $U@T_d-C_{27}B^+-3$  | 0.0        | 486.43           |
| $T_d-C_{27}B^{6-}-3$ | 0.6        | 487.41           | $U@D_2-C_{27}B^+-1$  | 95.2       | 490.25           |
| $D_2-C_{27}B^{6-}-1$ | 29.1       | 492.79           | $U@D_2-C_{27}B^+-2$  | 105.8      | 491.17           |

|                     |      |        |                      |       |        |
|---------------------|------|--------|----------------------|-------|--------|
| $D_2-C_{27}B^{6-}2$ | 40.1 | 493.55 | $U@D_2-C_{27}B^{+}3$ | 105.3 | 490.90 |
| $D_2-C_{27}B^{6-}3$ | 35.8 | 492.97 | $U@D_2-C_{27}B^{+}4$ | 108.3 | 491.05 |
| $D_2-C_{27}B^{6-}4$ | 37.6 | 493.75 | $U@D_2-C_{27}B^{+}5$ | 106.3 | 490.92 |
| $D_2-C_{27}B^{6-}5$ | 40.6 | 493.57 | $U@D_2-C_{27}B^{+}6$ | 116.2 | 491.76 |
| $D_2-C_{27}B^{6-}6$ | 47.7 | 493.99 | $U@D_2-C_{27}B^{+}7$ | 117.9 | 491.92 |

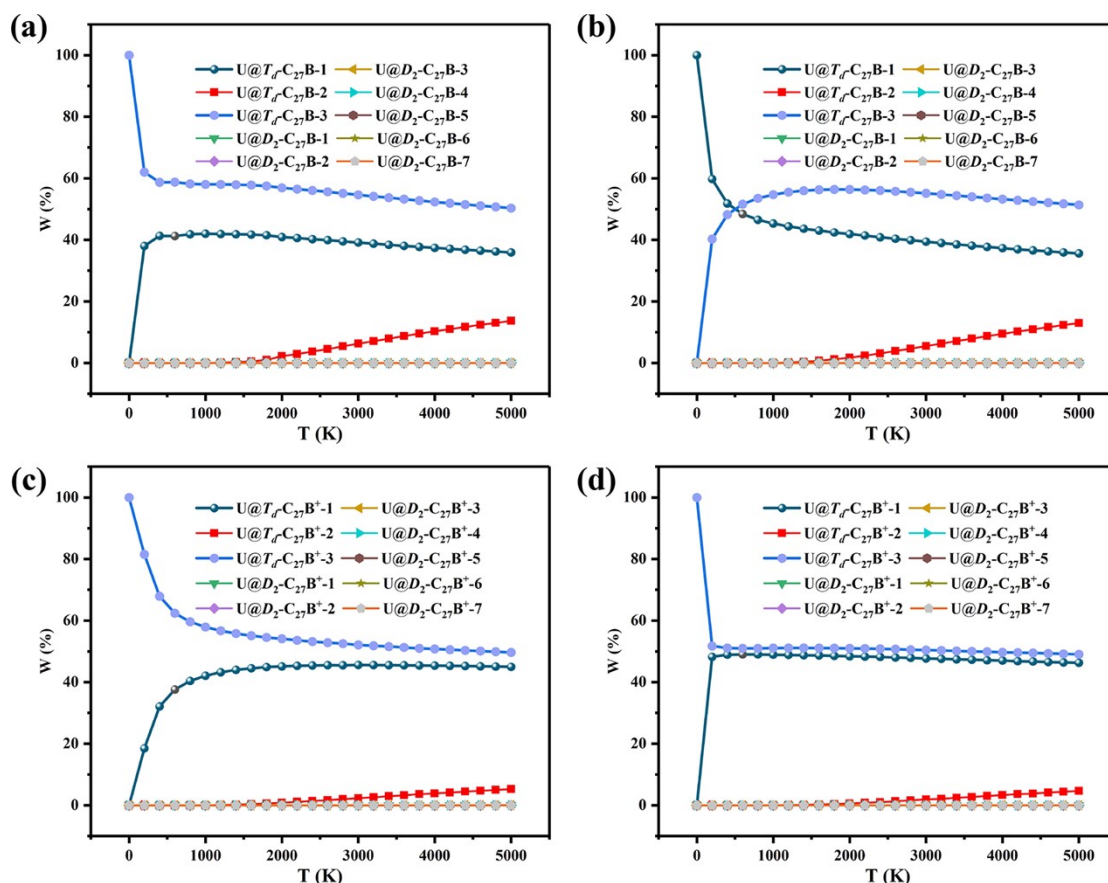

**Fig. S3** Relative concentrations of the ten  $U@C_{27}B^{0+}$  isomers at the (a)(c) B3LYP and (b)(d) M06-2X levels of theory.

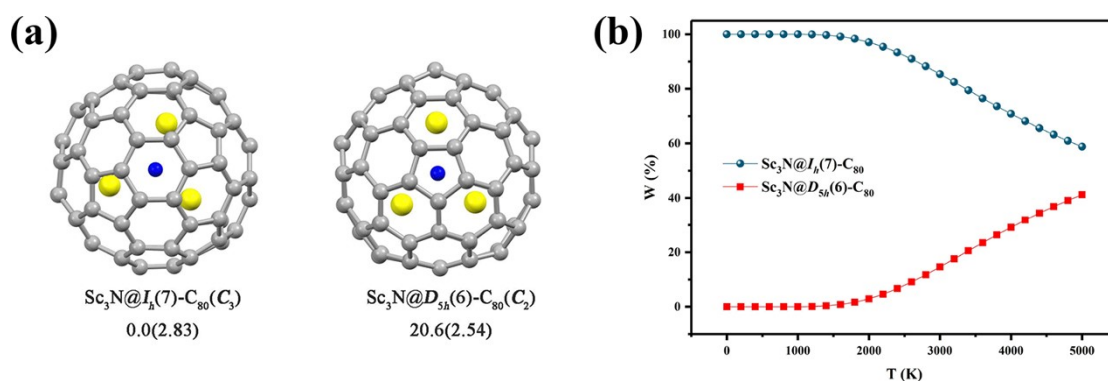

**Fig. S4** (a) Optimized structures and molecular symmetries of two  $\text{Sc}_3\text{N}@C_{80}$  isomers with relative energies (kcal/mol) and HOMO-LUMO gap energies (eV, in parentheses) as well as (b) Their relative concentrations at different temperatures at the PBE0/6-311G\*~SDD level of theory. C: gray; N: blue; Sc: yellow.

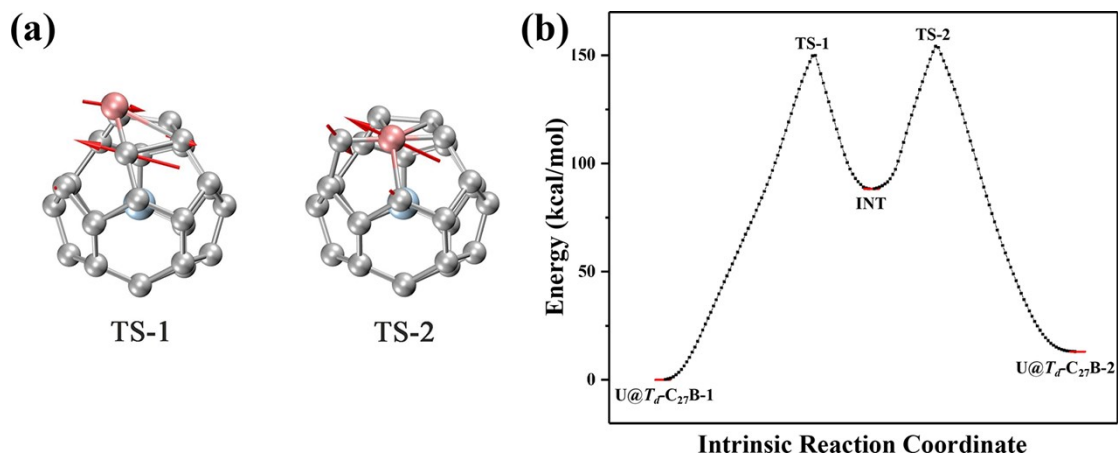

**Fig. S5** (a) Vibrational mode of the only imaginary frequency for TS-1 and TS-2; (b) Intrinsic reaction coordinate from  $\text{U}@T_d\text{-C}_{27}\text{B-1}$  to  $\text{U}@T_d\text{-C}_{27}\text{B-2}$ .

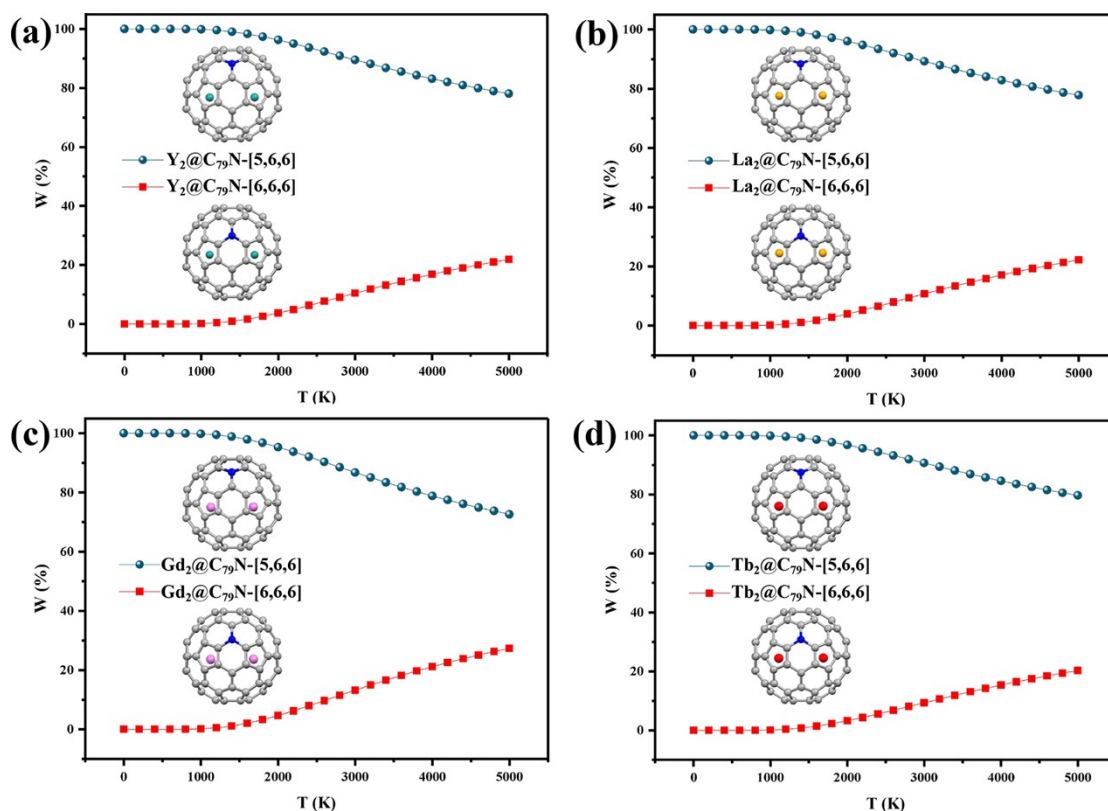

**Fig. S6** Relative concentrations of two (a)  $\text{Y}_2@C_{79}\text{N}$ , (b)  $\text{La}_2@C_{79}\text{N}$ , (c)  $\text{Gd}_2@C_{79}\text{N}$  and (d)  $\text{Tb}_2@C_{79}\text{N}$  azafullerene isomers at different temperatures at the PBE0/6-

311G\*~SDD level of theory.

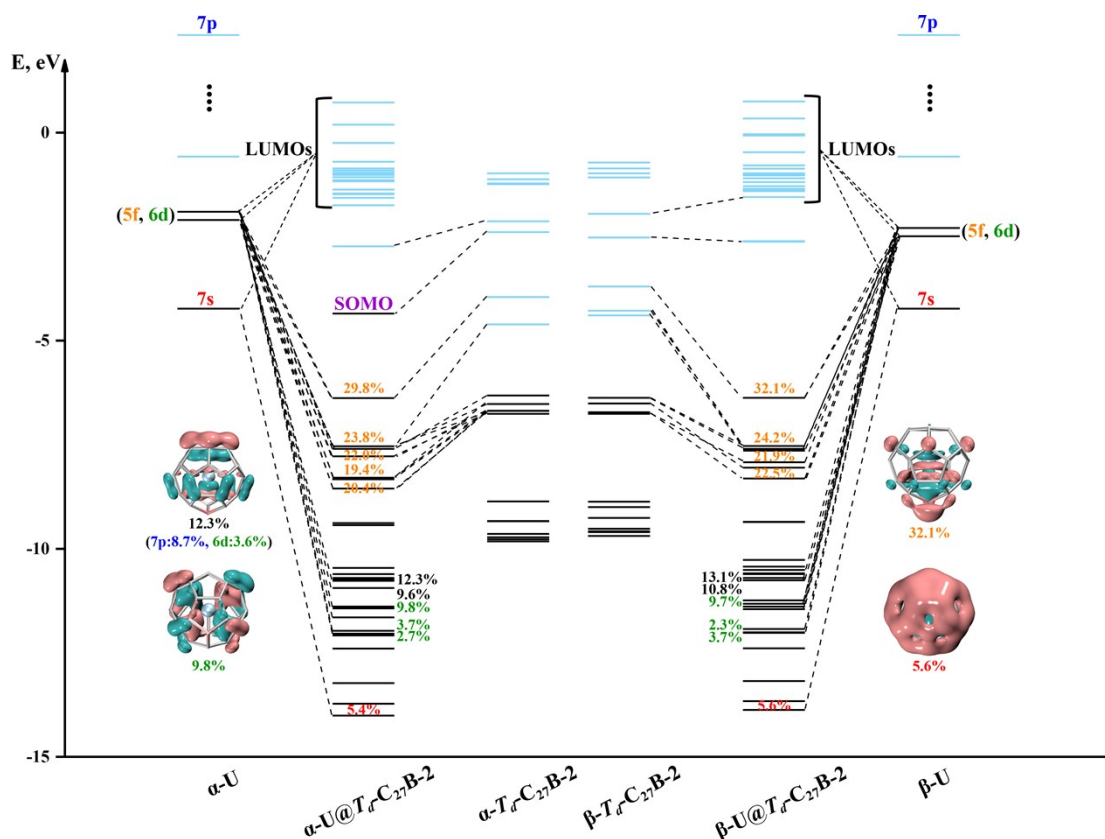

**Fig. S7** Orbital interaction diagram of  $U@T_d-C_{27}B-2$ . Occupied and unoccupied orbitals are denoted by black and blue lines, respectively. Total metal contributions to the occupied hybrid orbitals are given in %. Selected occupied orbitals with maximum contributions from each type of metal valence orbitals (isovalue:  $\pm 0.05$  a.u.) are plotted.



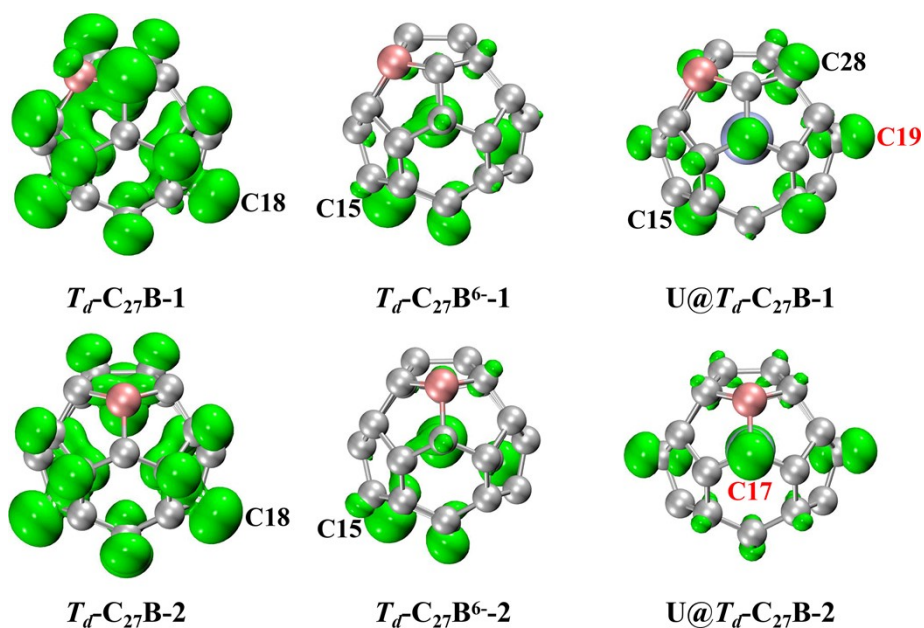

**Fig. S8** Spin density distributions (isovalue:  $\pm 0.005$  a.u.) of two  $T_d$ - $C_{27}B$ ,  $T_d$ - $C_{27}B^{6-}$  and  $U@T_d$ - $C_{27}B$  isomers. The carbon sites with large spin densities are shown. The sites for trifluoromethylation are highlighted in red.

**Table S6** AIM charges for the U atom, B atom and its C neighbors (average value) of  $T_d$ - $C_{27}B^{0/6-}$  and  $U@T_d$ - $C_{27}B^{0/+}$  isomers (PBE0/6-311G\*~SDD level).

| Isomers                    | Atom | Charge |
|----------------------------|------|--------|
| $T_d$ - $C_{27}B$ -1       | B    | +1.85  |
|                            | C    | -0.59  |
| $T_d$ - $C_{27}B$ -2       | B    | +1.89  |
|                            | C    | -0.62  |
| $T_d$ - $C_{27}B^{6-}$ -1  | B    | +1.69  |
|                            | C    | -0.93  |
| $T_d$ - $C_{27}B^{6-}$ -2  | B    | +1.06  |
|                            | C    | -0.68  |
| $U@T_d$ - $C_{27}B$ -1     | U    | +2.04  |
|                            | B    | +1.77  |
|                            | C    | -0.65  |
| $U@T_d$ - $C_{27}B$ -2     | U    | +2.04  |
|                            | B    | +1.73  |
|                            | C    | -0.65  |
| $U@T_d$ - $C_{27}B^{+}$ -1 | U    | +2.01  |
|                            | B    | +1.81  |
|                            | C    | -0.61  |
| $U@T_d$ - $C_{27}B^{+}$ -2 | U    | +1.99  |
|                            | B    | +1.76  |
|                            | C    | -0.60  |

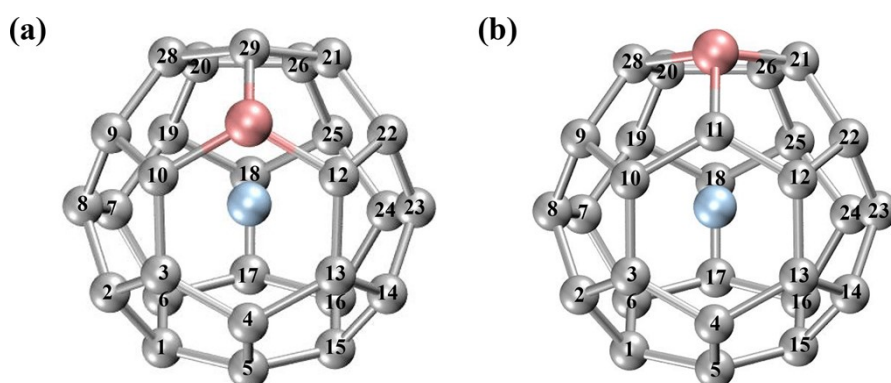

**Fig. S9** Molecular structures of (a)  $U@T_d-C_{27}B-1$  and (b)  $U@T_d-C_{27}B-2$  with atom numbering for studying U-cage interactions.

**Table S7** Bond lengths ( $d$ , Å), Wiberg bond indices (WBIs), Mayer bond orders (MBOs), delocalization indices ( $\delta$ ) and their respective sum for the U-cage interactions in  $U@T_d-C_{27}B$ . See Fig. S9 for the atom numbering.

| Isomer            | Atom pairs | $d$  | WBI  | MBO  | $\delta$ | Isomer            | Atom pairs | $d$  | WBI  | MBO  | $\delta$ |
|-------------------|------------|------|------|------|----------|-------------------|------------|------|------|------|----------|
| $U@T_d-C_{27}B-1$ | U-C1       | 2.47 | 0.52 | 0.30 | 0.26     | $U@T_d-C_{27}B-2$ | U-C1       | 2.45 | 0.53 | 0.29 | 0.27     |
|                   | U-C2       | 2.48 | 0.55 | 0.37 | 0.30     |                   | U-C2       | 2.49 | 0.55 | 0.38 | 0.30     |
|                   | U-C3       | 2.45 | 0.53 | 0.30 | 0.27     |                   | U-C3       | 2.43 | 0.54 | 0.29 | 0.27     |
|                   | U-C4       | 2.41 | 0.61 | 0.36 | 0.33     |                   | U-C4       | 2.43 | 0.58 | 0.34 | 0.30     |
|                   | U-C5       | 2.42 | 0.59 | 0.34 | 0.31     |                   | U-C5       | 2.45 | 0.57 | 0.34 | 0.30     |
|                   | U-C6       | 2.44 | 0.57 | 0.34 | 0.30     |                   | U-C6       | 2.44 | 0.56 | 0.34 | 0.30     |
|                   | U-C7       | 2.44 | 0.58 | 0.34 | 0.31     |                   | U-C7       | 2.43 | 0.58 | 0.33 | 0.30     |
|                   | U-C8       | 2.43 | 0.56 | 0.30 | 0.28     |                   | U-C8       | 2.47 | 0.51 | 0.29 | 0.25     |
|                   | U-C9       | 2.43 | 0.59 | 0.36 | 0.32     |                   | U-C9       | 2.42 | 0.59 | 0.36 | 0.32     |
|                   | U-C10      | 2.48 | 0.57 | 0.40 | 0.35     |                   | U-C10      | 2.42 | 0.59 | 0.36 | 0.32     |
|                   | U-B        | 2.57 | 0.48 | 0.26 | 0.09     |                   | U-C11      | 2.54 | 0.50 | 0.35 | 0.30     |
|                   | U-C12      | 2.48 | 0.57 | 0.40 | 0.35     |                   | U-C12      | 2.42 | 0.59 | 0.36 | 0.32     |
|                   | U-C13      | 2.45 | 0.53 | 0.30 | 0.27     |                   | U-C13      | 2.44 | 0.54 | 0.29 | 0.27     |

|            |      |       |       |      |       |      |       |       |      |      |
|------------|------|-------|-------|------|-------|------|-------|-------|------|------|
| U-C14      | 2.48 | 0.55  | 0.37  | 0.30 | U-C14 | 2.49 | 0.55  | 0.38  | 0.30 |      |
| U-C15      | 2.47 | 0.52  | 0.30  | 0.26 | U-C15 | 2.45 | 0.53  | 0.29  | 0.27 |      |
| U-C16      | 2.44 | 0.57  | 0.34  | 0.30 | U-C16 | 2.44 | 0.56  | 0.34  | 0.30 |      |
| U-C17      | 2.45 | 0.55  | 0.32  | 0.28 | U-C17 | 2.52 | 0.47  | 0.27  | 0.22 |      |
| U-C18      | 2.50 | 0.53  | 0.37  | 0.29 | U-C18 | 2.50 | 0.54  | 0.38  | 0.29 |      |
| U-C19      | 2.48 | 0.51  | 0.29  | 0.25 | U-C19 | 2.44 | 0.54  | 0.29  | 0.27 |      |
| U-C20      | 2.42 | 0.58  | 0.34  | 0.31 | U-C20 | 2.42 | 0.60  | 0.36  | 0.32 |      |
| U-C21      | 2.47 | 0.52  | 0.30  | 0.26 | U-C21 | 2.49 | 0.53  | 0.34  | 0.32 |      |
| U-C22      | 2.43 | 0.59  | 0.36  | 0.32 | U-C22 | 2.42 | 0.59  | 0.36  | 0.32 |      |
| U-C23      | 2.43 | 0.56  | 0.30  | 0.28 | U-C23 | 2.48 | 0.51  | 0.29  | 0.25 |      |
| U-C24      | 2.44 | 0.58  | 0.34  | 0.31 | U-C24 | 2.43 | 0.58  | 0.33  | 0.30 |      |
| U-C25      | 2.48 | 0.51  | 0.29  | 0.25 | U-C25 | 2.44 | 0.54  | 0.29  | 0.27 |      |
| U-C26      | 2.42 | 0.59  | 0.35  | 0.31 | U-C26 | 2.42 | 0.60  | 0.36  | 0.32 |      |
| U-C28      | 2.47 | 0.52  | 0.30  | 0.26 | U-C28 | 2.49 | 0.53  | 0.34  | 0.32 |      |
| U-C29      | 2.55 | 0.52  | 0.42  | 0.33 | U-B   | 2.62 | 0.51  | 0.34  | 0.12 |      |
| <b>Sum</b> | -    | 68.88 | 15.45 | 9.36 | 8.05  | -    | 68.88 | 15.41 | 9.28 | 8.01 |

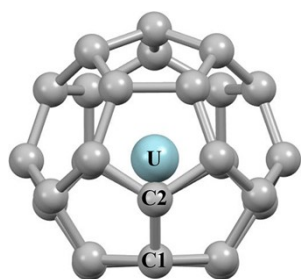

$U@T_d-C_{28}$

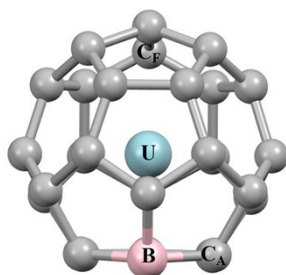

$U@T_d-C_{27}B-1$

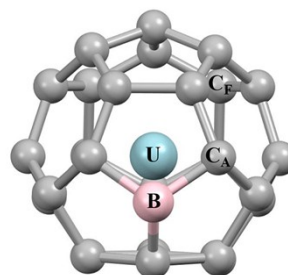

$U@T_d-C_{27}B-2$

**Fig. S10** Structures of  $U@T_d-C_{28}$ ,  $U@T_d-C_{27}B-1$  and  $U@T_d-C_{27}B-2$  with corresponding U, B, C sites used in the IQA analyses.

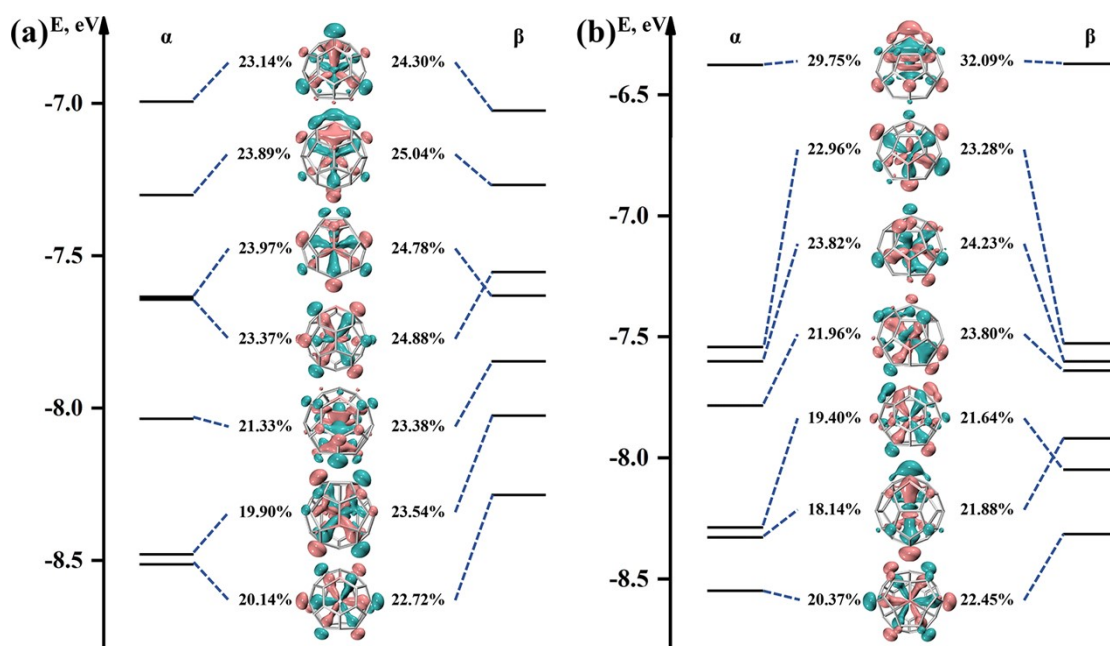

**Fig. S11** Some occupied molecular orbitals of (a)  $U@T_d-C_{27}B-1$  and (b)  $U@T_d-C_{27}B-2$  (isovalue:  $\pm 0.05$  a.u.) with total contribution (%) of U-5f to the orbital.

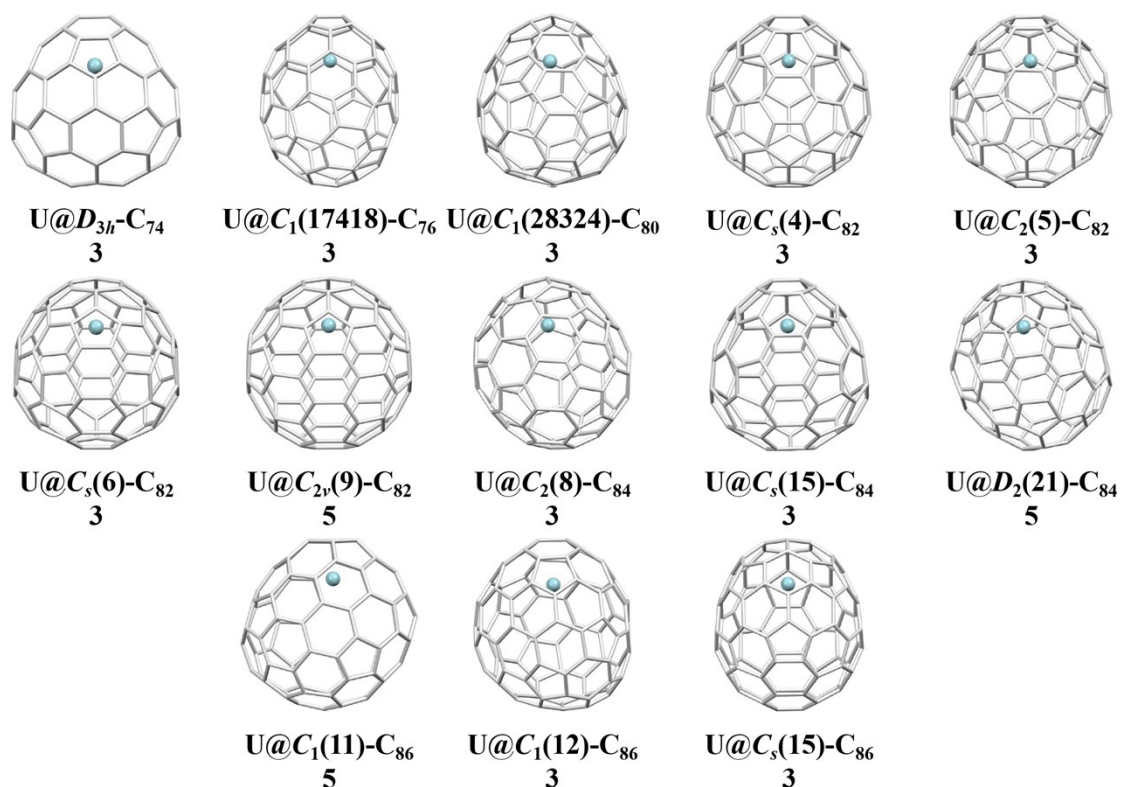

**Fig. S12** Optimized ground-state structures with spin multiplicities of all 13 U-based mono-EMFs characterized by single-crystal X-ray diffraction.

**Table S8** The bond lengths ( $d$ , Å) and Wiberg bond indices (WBIs) between U and

the nearest C atom on the cage in  $U@T_d-C_{27}B$  and  $U@C_{2n}$ .

| species                | <i>d</i> | WBI  | species              | <i>d</i> | WBI  |
|------------------------|----------|------|----------------------|----------|------|
| $U@T_d-C_{27}B-1$      | 2.41     | 0.61 | $U@C_{2v}(9)-C_{82}$ | 2.39     | 0.57 |
| $U@T_d-C_{28}$         | 2.42     | 0.59 | $U@C_2(8)-C_{84}$    | 2.44     | 0.57 |
| $U@D_{3h}-C_{74}$      | 2.41     | 0.59 | $U@C_s(15)-C_{84}$   | 2.47     | 0.52 |
| $U@C_1(17418)-C_{76}$  | 2.47     | 0.51 | $U@D_2(21)-C_{84}$   | 2.41     | 0.57 |
| $U@C_1(228324)-C_{80}$ | 2.39     | 0.62 | $U@C_1(11)-C_{86}$   | 2.41     | 0.58 |
| $U@C_s(4)-C_{82}$      | 2.45     | 0.55 | $U@C_1(12)-C_{86}$   | 2.48     | 0.51 |
| $U@C_2(5)-C_{82}$      | 2.45     | 0.54 | $U@C_s(15)-C_{86}$   | 2.41     | 0.58 |
| $U@C_s(6)-C_{82}$      | 2.39     | 0.57 |                      |          |      |

**Table S9** HOMO-LUMO gap energies (eV) of  $U@T_d-C_{27}B^+$  as compared to isoelectronic  $M@T_d-C_{28}$  at the PBE0/6-311G\*~SDD level.

| Species                                | HOMO-LUMO gap |
|----------------------------------------|---------------|
| $U@T_d-C_{27}B^+-1(U@T_d-C_{27}B^+-2)$ | 4.29(3.65)    |
| $Th@T_d-C_{28}$                        | 3.90          |
| $Ti@T_d-C_{28}$                        | 3.17          |
| $Zr@T_d-C_{28}$                        | 3.79          |
| $Hf@T_d-C_{28}$                        | 3.79          |

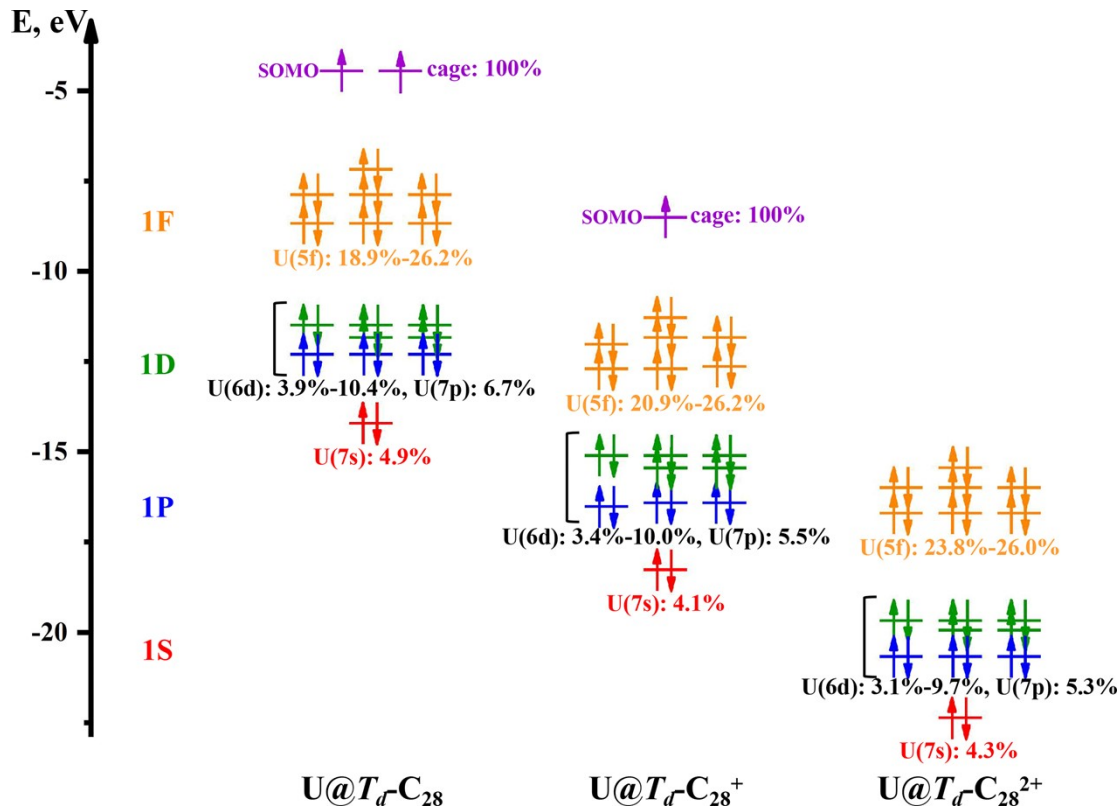

**Fig. S13** Molecular orbital diagrams with the 16 orbitals involved in 32-electron closed-shell configuration of  $U@T_d-C_{28}$ ,  $U@T_d-C_{28}^+$  and  $U@T_d-C_{28}^{2+}$ . Spin up and

spin down orbitals are plotted as degenerated for simplicity. U orbital contributions to the hybrid orbitals are given in different colors.

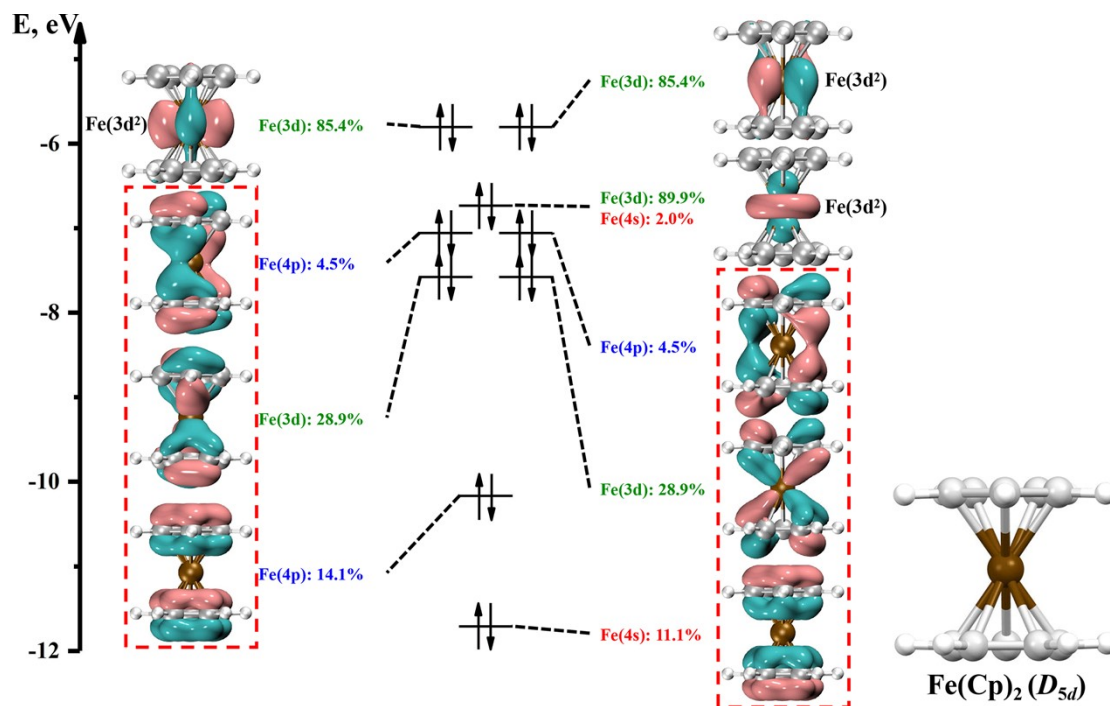

**Fig. S14** Molecular orbital diagrams with the nine orbitals involved in 18-electron closed-shell configuration of ferrocene. Fe orbital contributions to the six Fe-(Cp)<sub>2</sub> hybrid orbitals (highlighted in red box) are given in different colors.

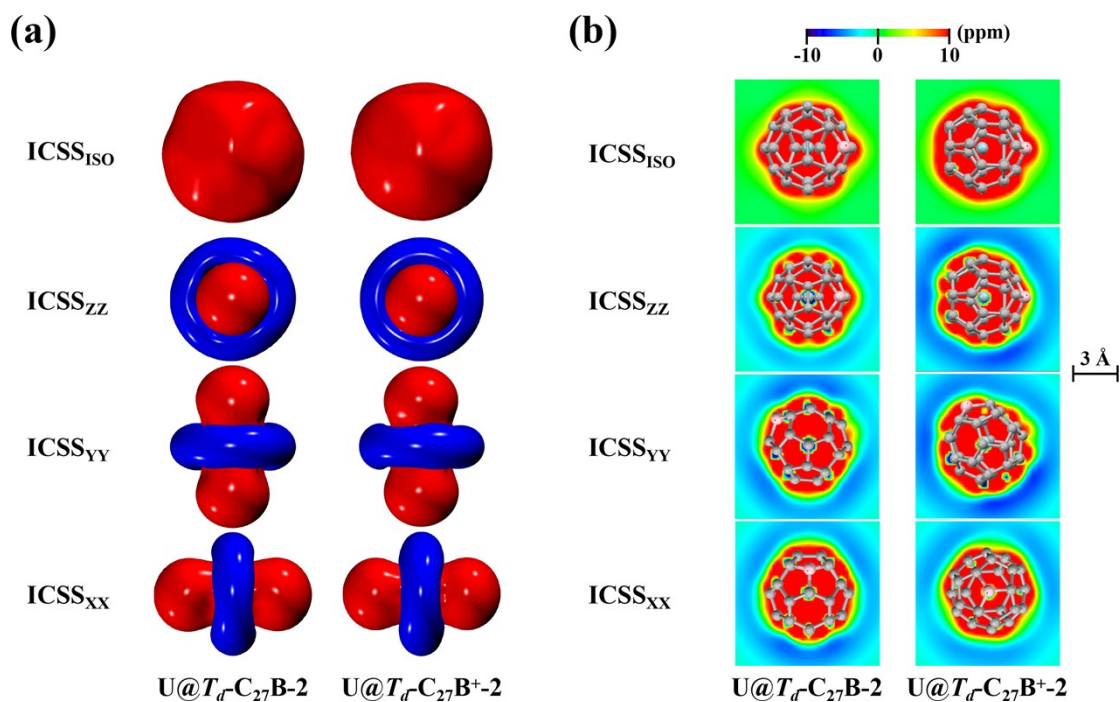

**Fig. S15** (a) Three-dimensional isosurfaces (-2 to +2 ppm) and (b) Contour plot representations of ICSS of U@T<sub>d</sub>-C<sub>27</sub>B<sup>0/+</sup>-2. Shielding and deshielding regions are in red and blue, respectively.

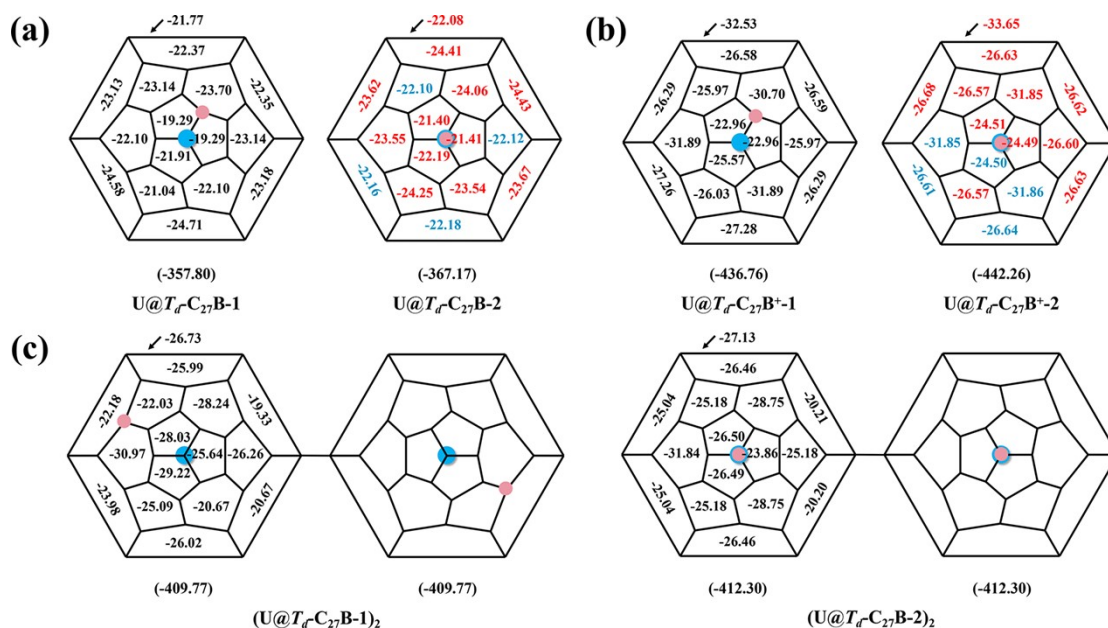

**Fig. S16** NICS values (ppm) of (a)  $U@T_d-C_{27}B$ , (b)  $U@T_d-C_{27}B^+$  and (c)  $(U@T_d-C_{27}B)_2$  at all unequal rings and their  $\Sigma$ NICS (in parentheses). The U and B atoms are denoted by blue dots and pink dots in the Schlegel diagrams. For the  $U@T_d-C_{27}B^{0/+}$ , the increased and decreased local ring aromaticity compared to  $U@T_d-C_{27}B^{0/+}-1$  are denoted by red and blue, respectively. Arrow represents the NICS value of the outer hexagonal ring.

**Table S10** Relative energies (kcal/mol) of five  $(U@T_d-C_{27}B)_2$  isomers with different spin multiplicities ( $M$ ) at PBE0/6-311G\*~SDD levels of theory.

| Isomers                               | $M$ | $\Delta E$ |
|---------------------------------------|-----|------------|
| $(U@T_d-C_{27}B-1)_2(C19-C19^*)$      | 1   | 0          |
|                                       | 3   | 55.2       |
| $(U@T_d-C_{27}B-1)_2(C15-C15^*)$      | 1   | 1.0        |
|                                       | 3   | 50.2       |
| $(U@T_d-C_{27}B-1)_2(C28-C28^*)$      | 1   | 4.9        |
|                                       | 3   | 53.9       |
| $(U@T_d-C_{27}B-1)-(U@T_d-C_{27}B-2)$ | 1   | 12.0       |
|                                       | 3   | 59.0       |
| $(U@T_d-C_{27}B-2)_2(C17-C17^*)$      | 1   | 23.7       |
|                                       | 3   | 76.6       |

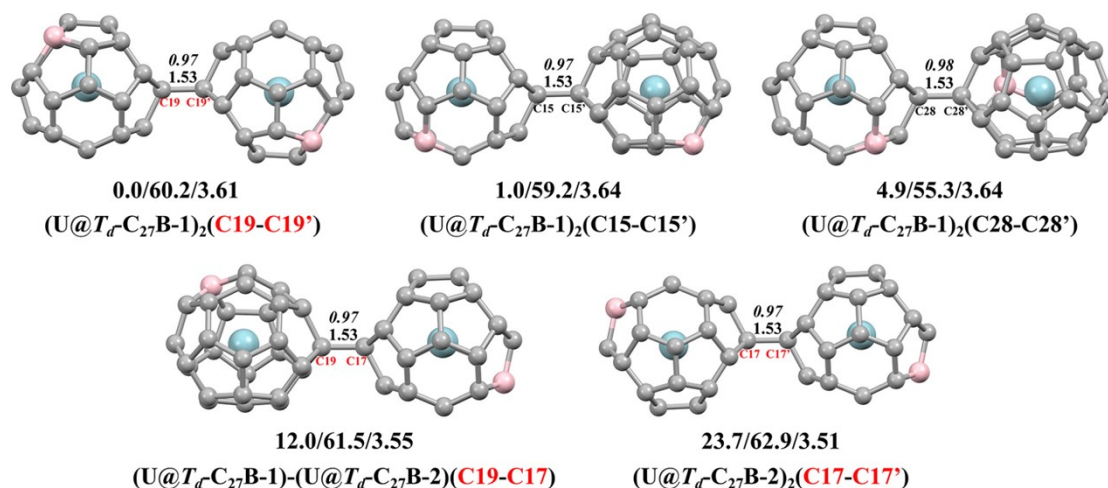

**Fig. S17** Optimized structures of five dimer isomers with relative energies (kcal/mol)/dimerization energies (kcal/mol)/HOMO-LUMO gap energies(eV). The bond lengths are given in Å and WBIs are italic. The carbon sites in monomers with large spin density values in Fig. S8 are shown.

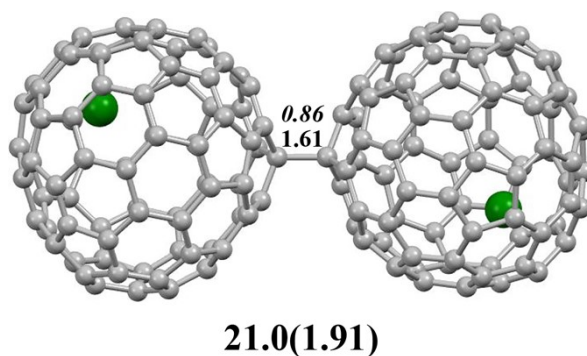

### Y@C<sub>s</sub>(6)-C<sub>82</sub> dimer

**Fig. S18** Optimized structure of Y@C<sub>s</sub>(6)-C<sub>82</sub> dimer with dimerization energy (kcal/mol) and HOMO-LUMO gap energy (eV, in parentheses) at the PBE0/6-311G\*~SDD levels of theory. The bond length is given in Å and WBI is italic. C: gray; Y: green.



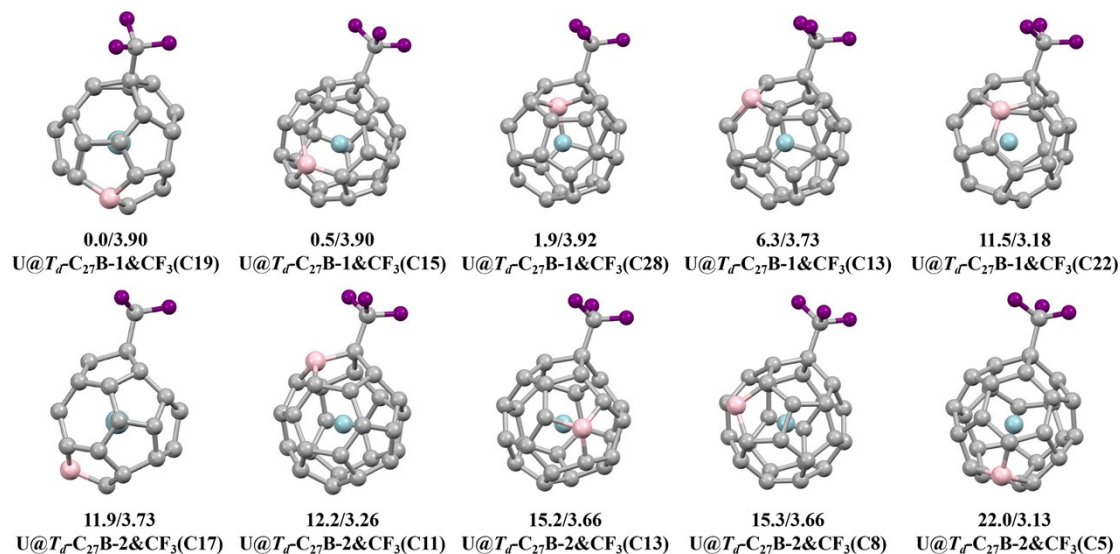

**Fig. S19** Optimized structures with relative energies (kcal/mol)/HOMO-LUMO gap energies (eV) of possible  $U@T_dC_{27}B&CF_3$  adduct isomers at different carbon sites in Fig. S9. C: gray; B: pink; F: purple; U: blue.

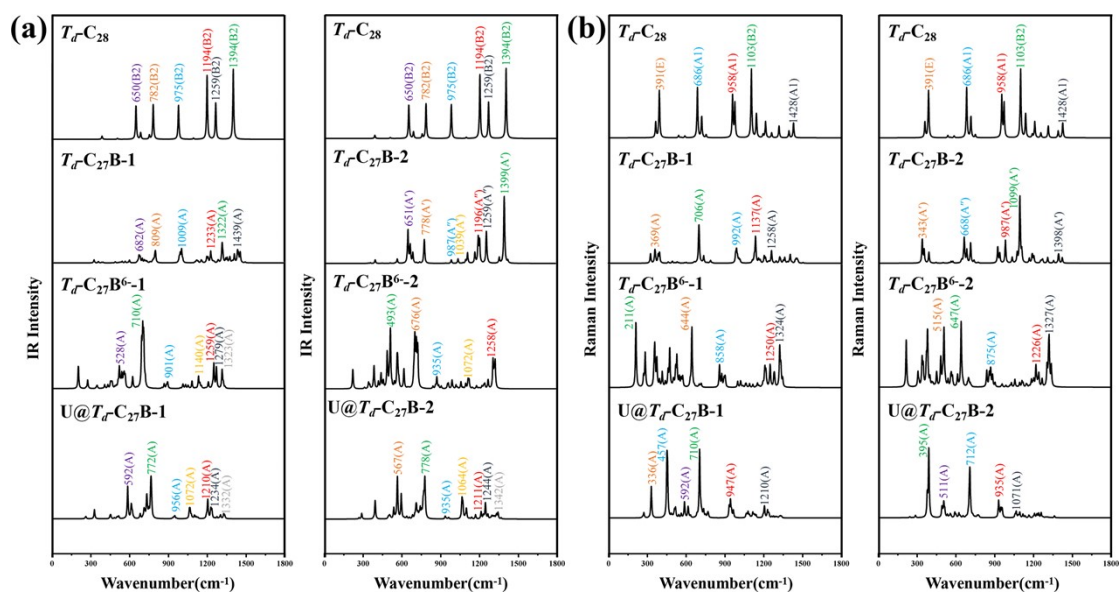

**Fig. S20** (a) IR and (b) Raman spectra of two  $U@T_dC_{27}B$  isomers and their corresponding empty parent cages.

**Table S11** Relative energies ( $\Delta E$ , kcal/mol) and HOMO(SOMO)-LUMO gaps (eV) of six classical and nonclassical (each contains a tetragon ring)  $C_{28}$  isomers at PBE0/6-311G\*~SDD level of theory.

| Isomer         | $\Delta E$ | HOMO(SOMO)-LUMO gaps |
|----------------|------------|----------------------|
| $T_dC_{28}$    | 0.0        | 2.70                 |
| $D_2C_{28}$    | 33.6       | 1.85                 |
| $C_{28}(NC)-1$ | 25.3       | 2.03                 |

|                        |      |      |
|------------------------|------|------|
| C <sub>28</sub> (NC)-2 | 46.9 | 2.46 |
| C <sub>28</sub> (NC)-3 | 43.6 | 2.04 |
| C <sub>28</sub> (NC)-4 | 79.4 | 2.18 |

**Table S12** Relative energies ( $\Delta E$ , kcal/mol) of twenty-nine classical and nonclassical U@C<sub>27</sub>B isomers at PBE0/6-311G\*~SDD level of theory.

| Isomer                                | $\Delta E$ | Isomer                     | $\Delta E$ |
|---------------------------------------|------------|----------------------------|------------|
| U@T <sub>d</sub> -C <sub>27</sub> B-1 | 0.0        | U@C <sub>27</sub> B(NC)-15 | 58.7       |
| U@C <sub>27</sub> B(NC)-1             | 46.0       | U@C <sub>27</sub> B(NC)-16 | 59.7       |
| U@C <sub>27</sub> B(NC)-2             | 50.8       | U@C <sub>27</sub> B(NC)-17 | 59.7       |
| U@C <sub>27</sub> B(NC)-3             | 54.5       | U@C <sub>27</sub> B(NC)-18 | 60.1       |
| U@C <sub>27</sub> B(NC)-4             | 54.5       | U@C <sub>27</sub> B(NC)-19 | 60.2       |
| U@C <sub>27</sub> B(NC)-5             | 55.3       | U@C <sub>27</sub> B(NC)-20 | 64.3       |
| U@C <sub>27</sub> B(NC)-6             | 56.0       | U@C <sub>27</sub> B(NC)-21 | 64.5       |
| U@C <sub>27</sub> B(NC)-7             | 56.5       | U@C <sub>27</sub> B(NC)-22 | 65.6       |
| U@C <sub>27</sub> B(NC)-8             | 56.8       | U@C <sub>27</sub> B(NC)-23 | 69.1       |
| U@C <sub>27</sub> B(NC)-9             | 57.4       | U@C <sub>27</sub> B(NC)-24 | 70.2       |
| U@C <sub>27</sub> B(NC)-10            | 57.8       | U@C <sub>27</sub> B(NC)-25 | 71.1       |
| U@C <sub>27</sub> B(NC)-11            | 58.0       | U@C <sub>27</sub> B(NC)-26 | 72.5       |
| U@C <sub>27</sub> B(NC)-12            | 58.1       | U@C <sub>27</sub> B(NC)-27 | 72.8       |
| U@C <sub>27</sub> B(NC)-13            | 58.2       | U@C <sub>27</sub> B(NC)-28 | 73.7       |
| U@C <sub>27</sub> B(NC)-14            | 58.4       |                            |            |

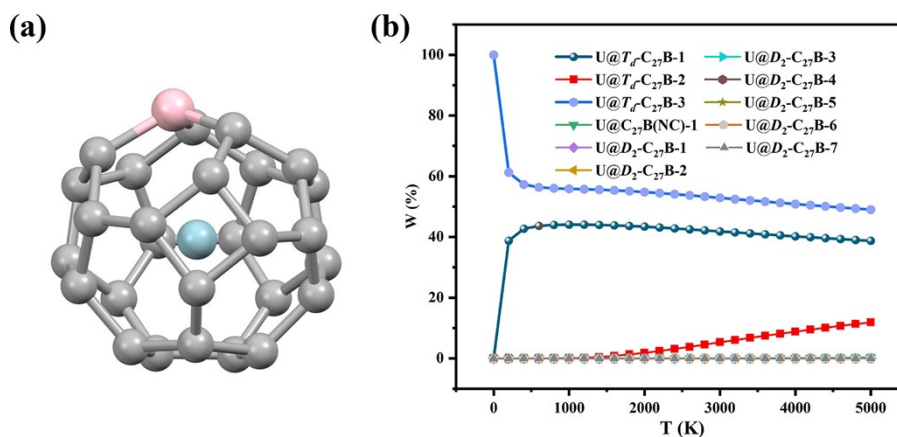

**Fig. S21** (a) Optimized structure of U@C<sub>27</sub>B(NC)-1 with a tetragon in the cage. (b) Relative concentrations of eleven classical and nonclassical U@C<sub>27</sub>B isomers as a function of temperature at the PBE0/6-311G\*~SDD level of theory.

#### Optimized Cartesian coordinates with the lowest vibrational frequency

##### U@T<sub>d</sub>-C<sub>27</sub>B-1 (272.0 cm<sup>-1</sup>)

C                    -2.07616600      0.85706000      -1.03479600

|   |             |             |             |
|---|-------------|-------------|-------------|
| C | -1.39681100 | 0.07821300  | -2.05334800 |
| C | -0.08437700 | 0.63727500  | -2.34260900 |
| C | 0.03206900  | 1.86102000  | -1.56456100 |
| C | -1.18708600 | 1.99105700  | -0.73537500 |
| C | -2.41836400 | -0.08093000 | 0.02327900  |
| C | -1.91384000 | -1.43877200 | -0.36378400 |
| C | -1.25692700 | -1.31151400 | -1.66644100 |
| C | 0.14767300  | -1.67912000 | -1.84060700 |
| C | 0.87773100  | -0.44489800 | -2.23298700 |
| C | 2.06326700  | -0.25741500 | -1.34348600 |
| C | 2.15442100  | 0.95347700  | -0.55305700 |
| C | 1.20414200  | 2.04568300  | -0.69858100 |
| C | 0.68237000  | 2.30890900  | 0.62892500  |
| C | -0.76711000 | 2.22900800  | 0.63437200  |
| C | -1.14139800 | 1.31393100  | 1.69895100  |
| C | -2.02901100 | 0.17837500  | 1.39951800  |
| C | -1.32257000 | -1.00745100 | 1.84655200  |
| C | -1.21017200 | -1.99655000 | 0.79361900  |
| C | 0.19638600  | -2.38661400 | 0.70383500  |
| C | 2.11351800  | -1.37783900 | -0.42260700 |
| C | 2.10787600  | -0.89360000 | 0.94555600  |
| C | 2.18200300  | 0.55271100  | 0.88971700  |
| C | 1.24677900  | 1.40229000  | 1.60989500  |
| C | 0.10489800  | 0.78674100  | 2.29847400  |
| C | 0.00448600  | -0.66449800 | 2.33658400  |
| C | 0.95163400  | -1.52427700 | 1.65069500  |
| B | 0.91422200  | -2.32498300 | -0.66338400 |
| U | -0.00177900 | -0.01270400 | -0.00358100 |

**U@T<sub>r</sub>-C<sub>27</sub>B-2 (258.0 cm<sup>-1</sup>)**

|   |             |             |             |
|---|-------------|-------------|-------------|
| C | -1.19072300 | -1.26020000 | -1.71820700 |
| C | 0.00507100  | -2.03138100 | -1.43281600 |
| C | 1.19095000  | -1.24290500 | -1.72768700 |
| C | 0.72564700  | 0.01459200  | -2.32162500 |
| C | -0.75460800 | 0.00262900  | -2.32023500 |
| C | -2.00244900 | -1.27229900 | -0.52484400 |
| C | -1.24590000 | -2.01603000 | 0.52292900  |
| C | 0.01972100  | -2.47787100 | -0.05318700 |
| C | 1.27643000  | -1.99791700 | 0.52607700  |
| C | 2.02097600  | -1.23217700 | -0.54447700 |
| C | 2.55577700  | 0.02085300  | 0.00402300  |
| C | 2.00072000  | 1.26899600  | -0.53523100 |
| C | 1.17042200  | 1.27510400  | -1.71810400 |

|   |             |             |             |
|---|-------------|-------------|-------------|
| C | -0.02783900 | 2.04204800  | -1.41805700 |
| C | -1.21120200 | 1.25376100  | -1.70935100 |
| C | -2.02262700 | 1.24424300  | -0.51573400 |
| C | -2.51206900 | -0.02011800 | 0.05408100  |
| C | -2.03993800 | -0.02127300 | 1.43048500  |
| C | -1.24210200 | -1.19945000 | 1.72041600  |
| C | 0.01773900  | -0.75595200 | 2.31057400  |
| C | 1.27573100  | 1.23918600  | 1.76604900  |
| C | 1.24390300  | 2.01437500  | 0.54074600  |
| C | -0.02013100 | 2.47856700  | -0.03520100 |
| C | -1.27798100 | 1.99227500  | 0.53736900  |
| C | -1.26109700 | 1.16755100  | 1.72882200  |
| C | 0.00573400  | 0.73956200  | 2.31586000  |
| U | 0.01289900  | -0.00030800 | 0.00746200  |
| C | 1.29595400  | -1.23155900 | 1.75677300  |
| B | 2.16733400  | 0.01213800  | 1.49535300  |

**U@T<sub>r</sub>-C<sub>27</sub>B-3 (258.0 cm<sup>-1</sup>)**

|   |             |             |             |
|---|-------------|-------------|-------------|
| C | -1.04403100 | -1.48412900 | 1.61732600  |
| C | -2.00781000 | -0.42565700 | 1.40198900  |
| C | -1.42088700 | 0.86326500  | 1.79419000  |
| C | -0.10459200 | 0.55838300  | 2.36137300  |
| C | 0.13039300  | -0.89679200 | 2.25928100  |
| C | -0.92567700 | -2.21629100 | 0.37712500  |
| C | -1.79313300 | -1.52493000 | -0.61804300 |
| C | -2.50035200 | -0.43083000 | 0.03290000  |
| B | -2.31158900 | 1.01428300  | -0.48174000 |
| C | -1.58221100 | 1.79548000  | 0.70195400  |
| C | -0.38724100 | 2.43967100  | 0.14617200  |
| C | 0.93554900  | 2.12893900  | 0.67736100  |
| C | 1.06649000  | 1.23468700  | 1.80865200  |
| C | 2.02409800  | 0.21003800  | 1.43707300  |
| C | 1.44104200  | -1.10071400 | 1.64210500  |
| C | 1.56141000  | -1.81244700 | 0.39125500  |
| C | 0.39639700  | -2.44523600 | -0.22240200 |
| C | 0.31621700  | -1.89761800 | -1.56332300 |
| C | -0.98371000 | -1.29182700 | -1.81101300 |
| C | -0.73300600 | 0.06401200  | -2.31904100 |
| C | -0.32644000 | 2.10146500  | -1.27779900 |
| C | 0.96775500  | 1.54363700  | -1.60503200 |
| C | 1.78775100  | 1.59156000  | -0.41667200 |
| C | 2.47248500  | 0.38163700  | 0.06733200  |
| C | 2.17564700  | -0.88772300 | -0.59611500 |

|   |             |             |             |
|---|-------------|-------------|-------------|
| C | 1.37305500  | -0.93139700 | -1.79575500 |
| C | 0.73063200  | 0.28338400  | -2.30849900 |
| C | -1.39978000 | 1.20735200  | -1.70216500 |
| U | -0.01589500 | 0.00631600  | -0.00513800 |

**INT (215.5 cm<sup>-1</sup>)**

|   |             |             |             |
|---|-------------|-------------|-------------|
| C | 1.12819700  | 1.83779600  | -1.13872100 |
| C | 1.97738400  | 0.68255500  | -1.34646900 |
| C | 2.50652800  | 0.26862100  | -0.05886600 |
| C | 1.97197900  | 1.09543000  | 0.98579500  |
| C | 1.15609100  | 2.11960300  | 0.32378500  |
| C | -0.11449400 | 1.56000300  | -1.81630100 |
| C | -0.07021900 | 0.13103100  | -2.36230200 |
| C | 1.27070400  | -0.43832500 | -2.00390800 |
| C | 1.59340900  | -1.60568100 | -1.13222100 |
| C | 2.32787800  | -1.11555700 | 0.02809500  |
| C | 1.46025600  | -1.82311300 | 1.01580900  |
| C | 0.78359900  | -0.99366600 | 1.99353500  |
| C | 1.18078600  | 0.43607900  | 2.06190100  |
| C | -0.03475100 | 1.21781200  | 2.14078700  |
| C | -0.08018700 | 2.20292500  | 1.06863500  |
| C | -1.32525100 | 2.01805600  | 0.37354700  |
| C | -1.37044500 | 1.77245400  | -1.07968600 |
| C | -2.10437600 | 0.55619600  | -1.26505700 |
| C | -1.35411300 | -0.50806000 | -1.96334700 |
| C | -1.58023800 | -1.72875900 | -1.18665700 |
| C | 0.79541500  | -2.44130600 | -0.18723900 |
| C | -1.36619300 | -1.90183100 | 1.04077600  |
| C | -0.73338600 | -1.04292200 | 2.01548400  |
| C | -1.20650800 | 0.37055100  | 2.12073900  |
| C | -2.03764000 | 0.93379900  | 1.04548200  |
| C | -2.54715000 | 0.08482400  | 0.01945900  |
| C | -2.25280200 | -1.30016500 | 0.05281100  |
| B | -0.66230000 | -2.56765700 | -0.20857600 |
| U | 0.03765900  | -0.01621500 | -0.03730800 |

**TS-1 (721.1i cm<sup>-1</sup>)**

|   |            |             |             |
|---|------------|-------------|-------------|
| C | 1.97637200 | -0.10754400 | -1.43906800 |
| C | 1.56979300 | -1.47557900 | -1.27802800 |
| C | 1.63712100 | -1.86448000 | 0.11577700  |
| C | 2.18193300 | -0.74206700 | 0.84637500  |
| C | 2.42489500 | 0.36142300  | -0.12864600 |
| C | 0.90226200 | 0.56100000  | -2.17149100 |

|   |             |             |             |
|---|-------------|-------------|-------------|
| C | -0.23828400 | -0.41310000 | -2.35174800 |
| C | 0.19525500  | -1.69853500 | -1.75325900 |
| C | -0.53721800 | -2.43628000 | -0.76311500 |
| C | 0.35146500  | -2.42329500 | 0.43634800  |
| C | -0.47191100 | -1.84926100 | 1.54048700  |
| C | 0.07408500  | -0.71233500 | 2.28869700  |
| C | 1.41814900  | -0.21397400 | 1.96082900  |
| C | 1.31716100  | 1.21880100  | 1.73476200  |
| C | 1.87544800  | 1.57713000  | 0.43961600  |
| C | 0.82919000  | 2.27623500  | -0.28956600 |
| C | 0.38044000  | 1.79035800  | -1.59626600 |
| C | -1.05454000 | 1.63938800  | -1.52866700 |
| C | -1.48427800 | 0.27408100  | -1.89562700 |
| C | -2.42875700 | -0.13856300 | -0.87640500 |
| C | -1.67410200 | -1.61242200 | 0.79407200  |
| C | -2.02629100 | 0.04531300  | 1.41890100  |
| C | -0.86228200 | 0.43696500  | 2.19209000  |
| C | -0.07517800 | 1.61135100  | 1.80908000  |
| C | -0.36057400 | 2.34478400  | 0.59091400  |
| C | -1.50279800 | 1.94132300  | -0.19214000 |
| C | -2.30738800 | 0.83300100  | 0.22437600  |
| B | -2.91330500 | -1.36828800 | 0.02467400  |
| U | 0.02072500  | -0.00544400 | -0.00970800 |

**TS-2 (620.3i cm<sup>-1</sup>)**

|   |             |             |             |
|---|-------------|-------------|-------------|
| C | -0.36099400 | 1.61832600  | -1.77582400 |
| C | 1.03261900  | 1.75062000  | -1.42601100 |
| C | 1.14829300  | 2.16673100  | -0.04332600 |
| C | -0.18783500 | 2.39781300  | 0.46644800  |
| C | -1.14529600 | 2.06617200  | -0.62240300 |
| C | -0.53528300 | 0.28868600  | -2.33977900 |
| C | 0.78150000  | -0.44426700 | -2.22486800 |
| C | 1.75374200  | 0.48953300  | -1.61640600 |
| C | 2.50089100  | 0.25235900  | -0.39349900 |
| C | 2.01126900  | 1.24423400  | 0.63381900  |
| C | 1.68560500  | 0.53376300  | 1.85307100  |
| C | 0.31204800  | 0.71408200  | 2.28561800  |
| C | -0.59008900 | 1.67688200  | 1.66329600  |
| C | -1.83883800 | 1.01615600  | 1.35069500  |
| C | -2.16738300 | 1.20020800  | -0.05905500 |
| C | -2.36515800 | -0.12727300 | -0.61968100 |
| C | -1.58161900 | -0.55414500 | -1.77770900 |
| C | -0.95873000 | -1.80669700 | -1.42264500 |

|   |             |             |             |
|---|-------------|-------------|-------------|
| C | 0.49866100  | -1.74627500 | -1.59174100 |
| C | 1.10448600  | -2.25672300 | -0.39101800 |
| C | 2.93595200  | -0.97315400 | 0.26552000  |
| C | 0.47341600  | -1.71513000 | 1.84529100  |
| C | -0.40083700 | -0.61235900 | 2.29915400  |
| C | -1.71697700 | -0.39760900 | 1.67922300  |
| C | -2.13685900 | -1.11218400 | 0.47686200  |
| C | -1.25146100 | -2.13255500 | -0.03992100 |
| C | -0.00912800 | -2.40967700 | 0.61344000  |
| B | 1.72194900  | -1.33899200 | 1.04434200  |
| U | -0.02784500 | -0.00076300 | 0.00268500  |
